# Supplementary material
Source: ML conference proceedings conference paper supplement (https://proceedings.neurips.cc/paper_files/paper/2019/hash/74071a673307ca7459bcf75fbd024e09-Abstract.html)

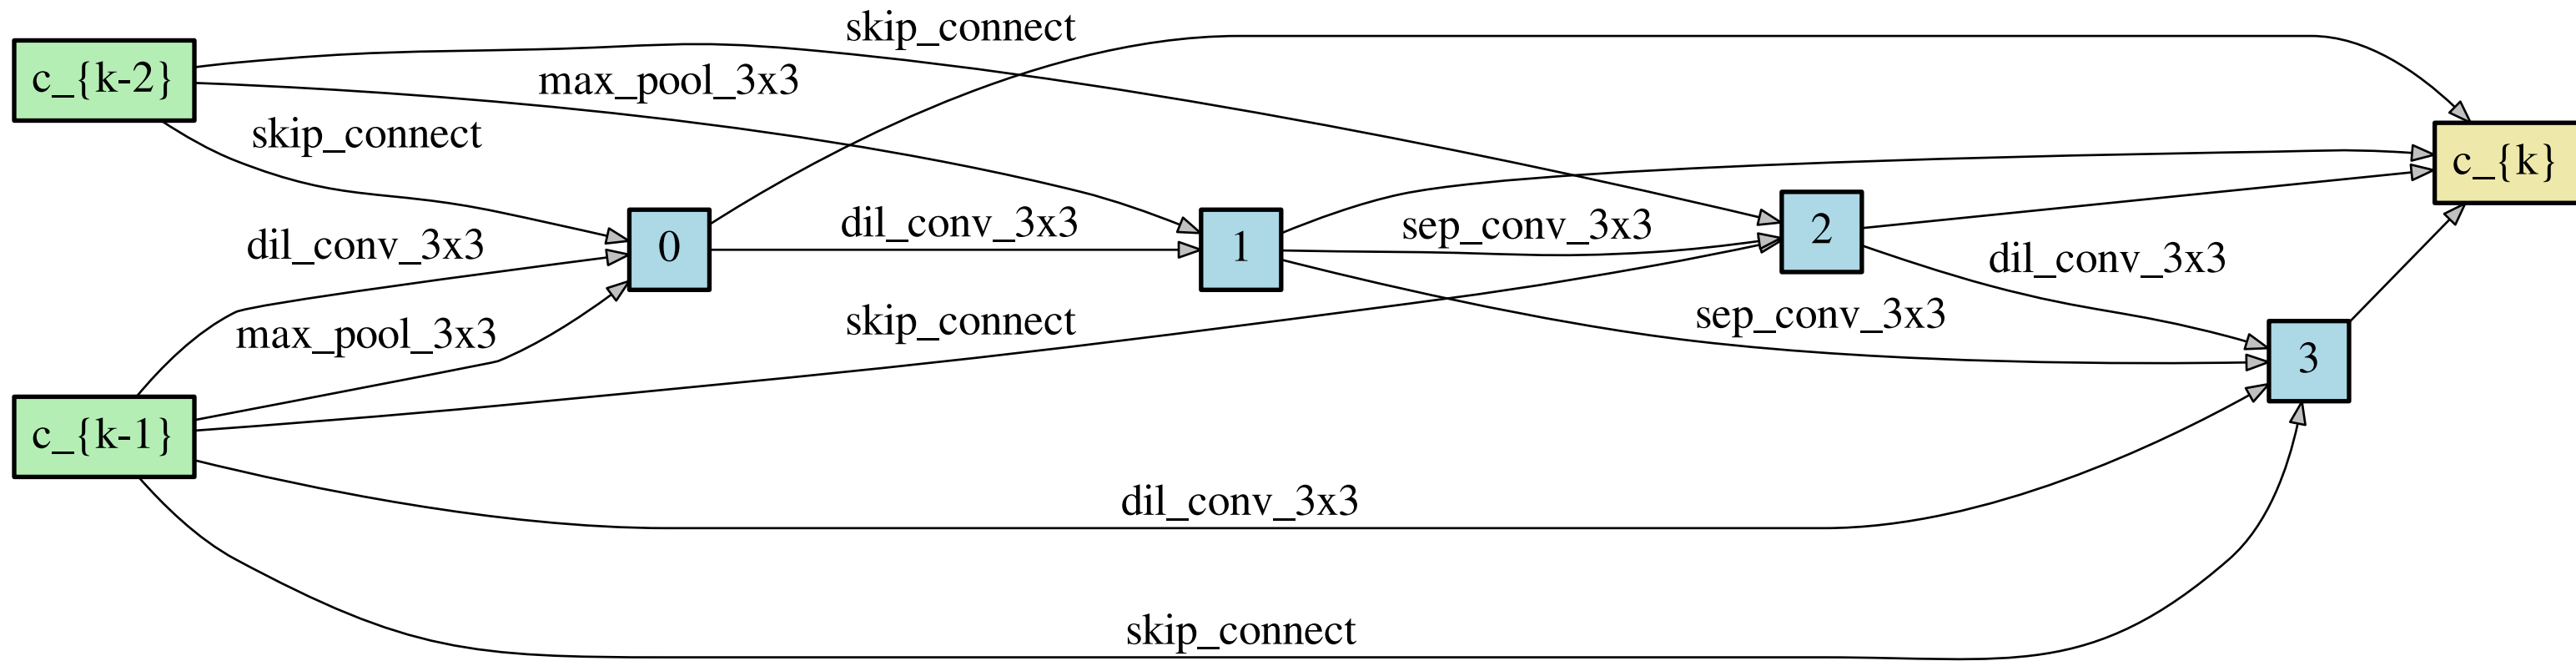

Supplement: Supplementary file [file 74071a673307ca7459bcf75fbd024e09-Supplemental.zip]
